# Supplementary material for: A human PSMB11 variant affects thymoproteasome processing and CD8+ T cell production
Source: JCI journal article supplement (doi:10.1172/jci.insight.93664), 2017-05-17

**Supplemental Table 1. Minor allele frequency of human single nucleotide variants accompanied with the alteration in the  $\beta 5t$  amino acid sequence.**

| rsID        | Residue change     | Minor allele frequency |
|-------------|--------------------|------------------------|
| rs34457782  | G49S               | 0.0084                 |
| rs149885629 | A203T              | 0.0038                 |
| rs572934212 | S80H (frame shift) | 0.0030                 |
| rs200339082 | R169C              | 0.0016                 |
| rs201138394 | R155H              | 0.0014                 |
| rs181637075 | R238H              | 0.0012                 |
| rs202220440 | R115Q              | 0.0008                 |
| rs572562943 | G152S              | 0.0008                 |
| rs200639481 | R169H              | 0.0006                 |
| rs149026126 | A212T              | 0.0004                 |

Listed are the top ten variants of the highest frequency in accordance with the dbSNP database hosted by NCBI. The rs34457782 variant that causes the G49S variation has the highest frequency, as shown in red letters.

**Supplemental Table 2. Minor allele frequency of  $\beta$ 5t-G49S variation in various human populations.**

| Population description                            | Sample no. | Minor allele frequency |
|---------------------------------------------------|------------|------------------------|
| African Caribbeans in Barbados                    | 96         | 0.0000                 |
| Americans of African Ancestry in SW USA           | 61         | 0.0000                 |
| Bengali from Bangladesh                           | 86         | 0.0116                 |
| Chinese Dai in Xishuangbanna, China               | 93         | 0.0054                 |
| Utah Residents with Northern and Western Ancestry | 99         | 0.0152                 |
| Han Chinese in Beijing, China                     | 103        | 0.0485                 |
| Southern Han Chinese                              | 105        | 0.019                  |
| Colombians from Medellin, Colombia                | 94         | 0.0000                 |
| Esan in Nigeria                                   | 99         | 0.0000                 |
| Finnish in Finland                                | 99         | 0.0303                 |
| British in England and Scotland                   | 91         | 0.0000                 |
| Gujarati Indian from Houston, Texas               | 103        | 0.0000                 |
| Gambian in Western Divisions in the Gambia        | 113        | 0.0000                 |
| Iberian Population in Spain                       | 107        | 0.0000                 |
| Indian Telugu from the UK                         | 102        | 0.0000                 |
| Japanese in Tokyo, Japan                          | 104        | 0.0240                 |
| Kinh in Ho Chi Minh City, Vietnam                 | 99         | 0.0303                 |
| Luhya in Webuye, Kenya                            | 99         | 0.0051                 |
| Mende in Sierra Leone                             | 85         | 0.0000                 |
| Mexican Ancestry from Los Angeles USA             | 64         | 0.0000                 |
| Peruvians from Lima, Peru                         | 85         | 0.0000                 |
| Punjabi from Lahore, Pakistan                     | 96         | 0.0000                 |
| Puerto Ricans from Puerto Rico                    | 104        | 0.0144                 |
| Sri Lankan Tamil from the UK                      | 102        | 0.0000                 |
| Toscani in Italia                                 | 107        | 0.0047                 |
| Yoruba in Ibadan, Nigeria                         | 108        | 0.0000                 |

Sample number and minor allele frequency are listed in accordance with the NCBI database.

**Supplemental Table 3. Genotypes of rs34457782 variant determined in genomic DNAs from 949 healthy volunteers collected at the University of Tokushima.**

| Genotype       | Number | Frequency (%) |
|----------------|--------|---------------|
| G/G            | 890    | 93.78         |
| G/A            | 59     | 6.21          |
| A/A            | 0      | 0             |
|                |        |               |
| Major G allele | 1,839  | 96.89         |
| Minor A allele | 59     | 3.11          |

The observed genotype distribution showed no significant deviation from the Hardy-Weinberg equilibrium ( $\chi^2=0.98$ ,  $df=1$ ,  $p=0.32$ ).

Figure 1A

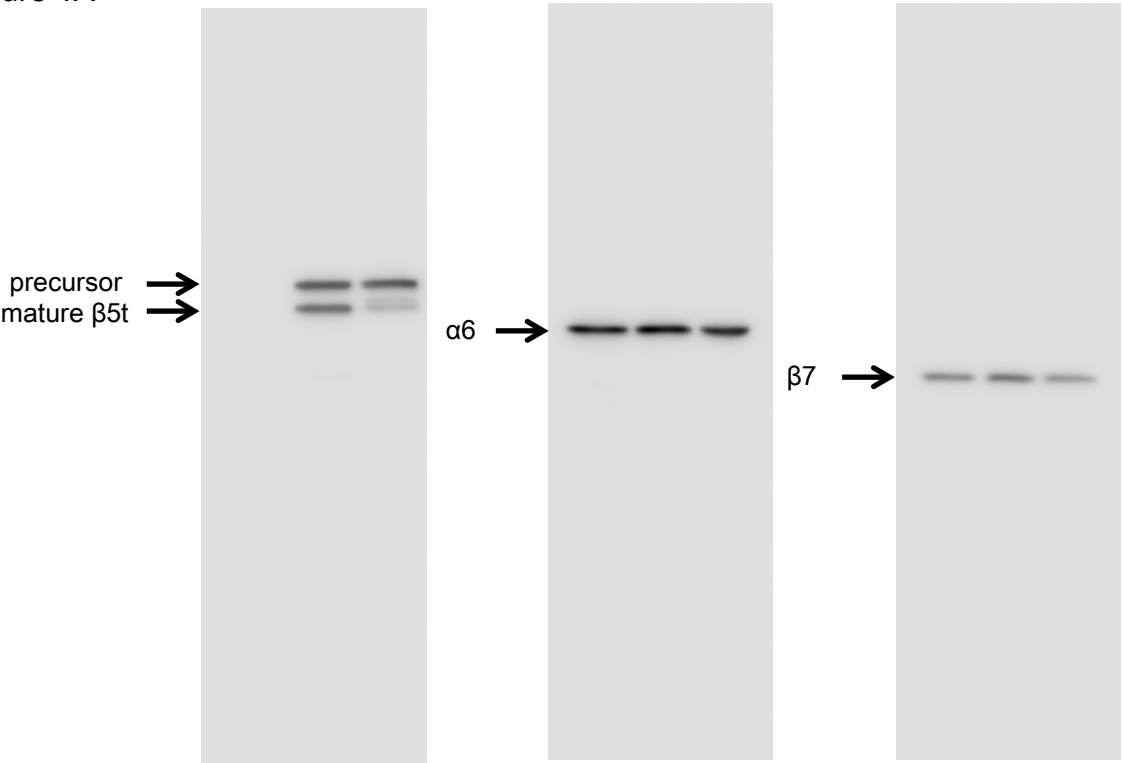

Figure 1B

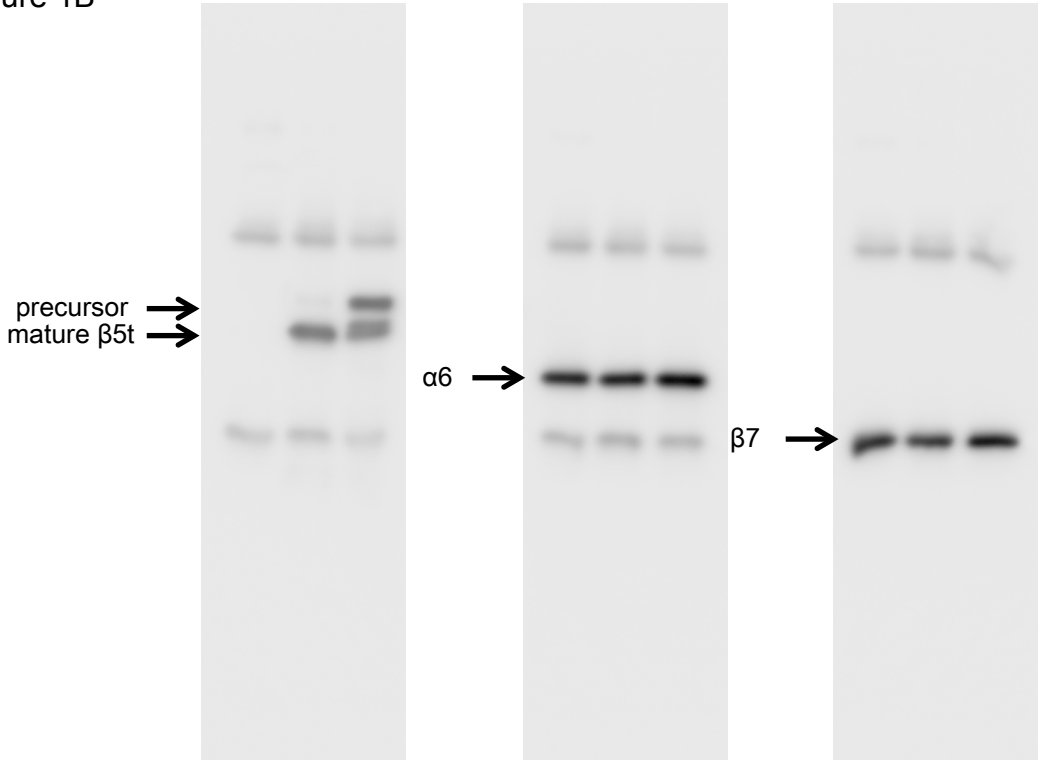

Figure 1C

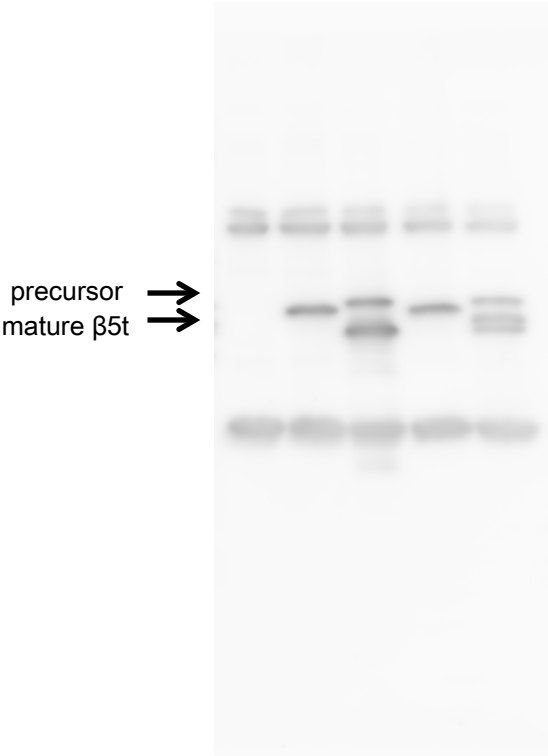

Figure 2B

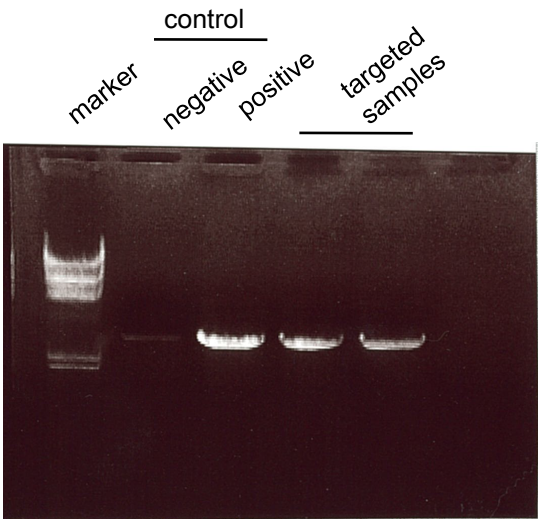

Figure 2C

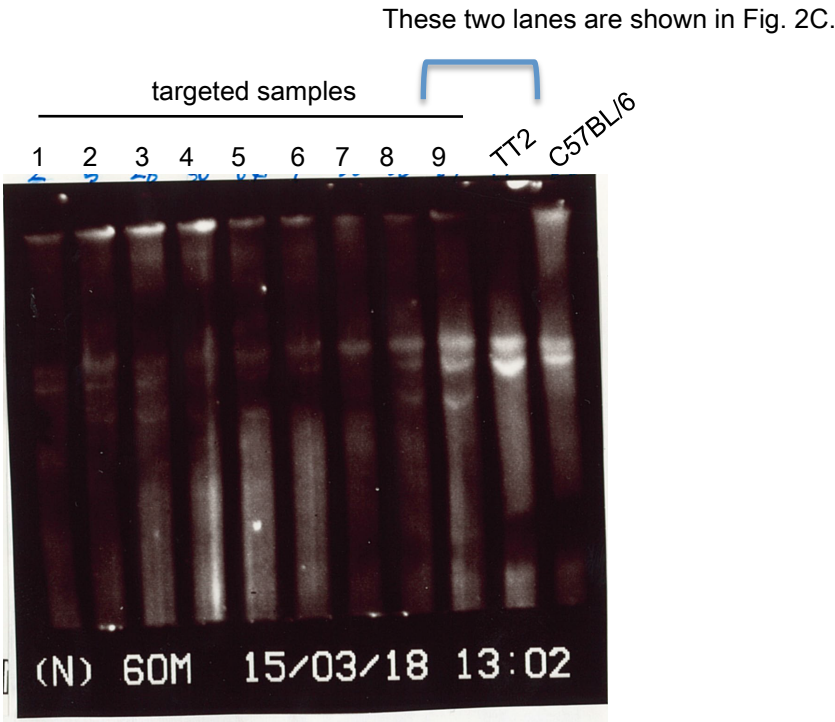

Supplement: sd1 [file 1]
